# Supplementary material for: Lack of concordance between residual viremia and viral variants driving de novo infection of CD4+ T cells on ART
Source: PubMed Central journal article supplement (PMC4970251; doi:10.1186/s12977-016-0282-9), 2016-08-02

## Additional file 2: Figure S2.

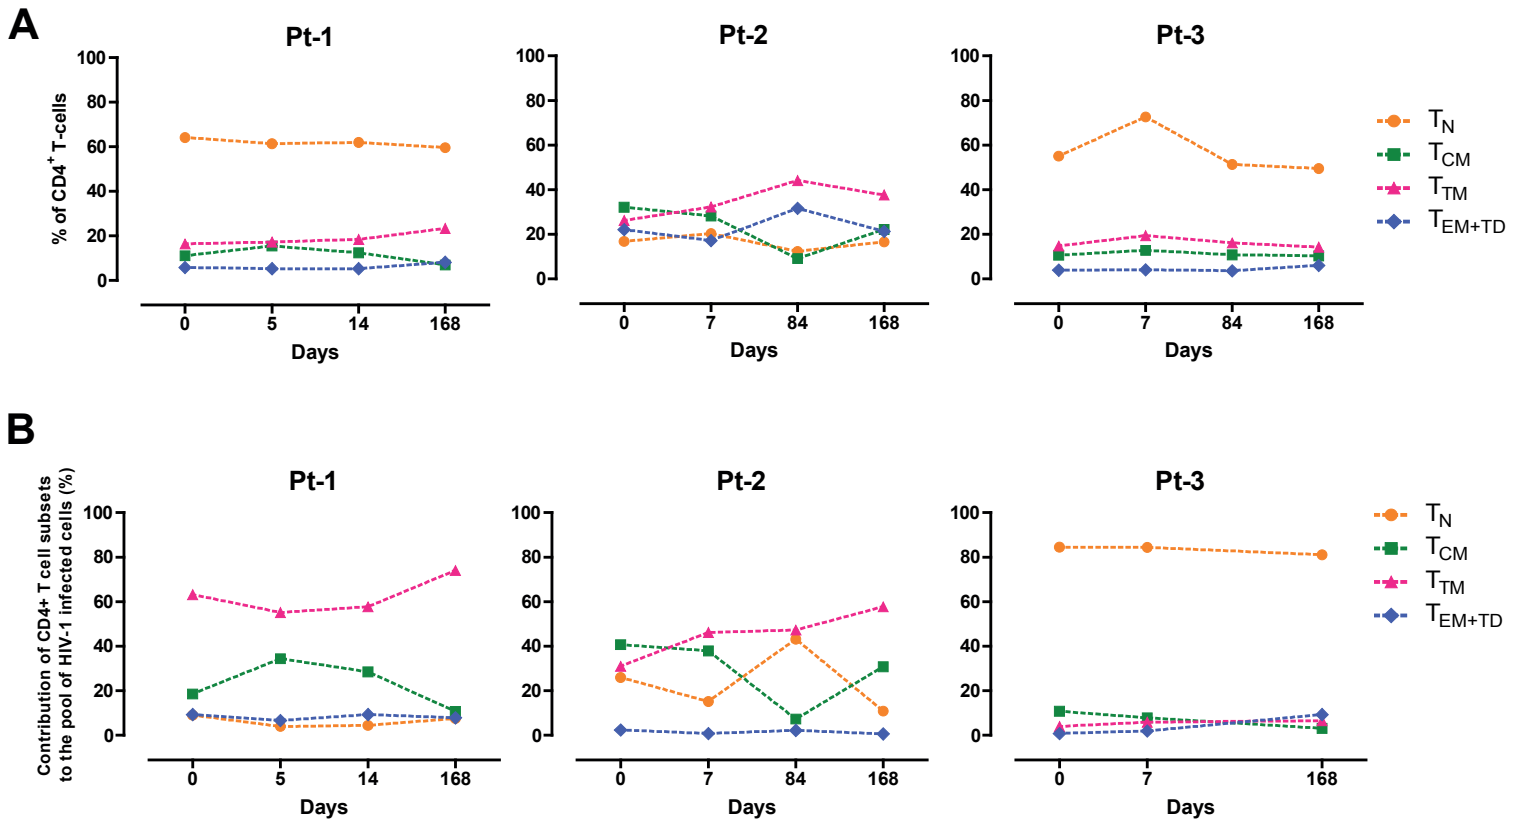

Supplement: 12977_2016_282_MOESM2_ESM.pdf [file 12977_2016_282_MOESM2_ESM.pdf]
